# Supplementary material for: Efficacy of acupuncture in improving the symptoms and the quality of life of patients with moderate or severe acne vulgaris: study protocol for a randomized controlled trial
Source: Springer Nature journal article supplement (doi:10.1186/s13063-020-04346-7), 2020-06-23
Supplement: MOESM1 [file 18112538]

**Ethics Approval of Guang'anmen Hospital of China Academy of Chinese Medical Sciences**

|                       |                                                                                                                                                                                                                                                                                                                                                                                                                                                                                                                                                                                                                                                                                                                                                                                                                                                                                                                                                                                                                                                |                 |                                                                                                  |
|-----------------------|------------------------------------------------------------------------------------------------------------------------------------------------------------------------------------------------------------------------------------------------------------------------------------------------------------------------------------------------------------------------------------------------------------------------------------------------------------------------------------------------------------------------------------------------------------------------------------------------------------------------------------------------------------------------------------------------------------------------------------------------------------------------------------------------------------------------------------------------------------------------------------------------------------------------------------------------------------------------------------------------------------------------------------------------|-----------------|--------------------------------------------------------------------------------------------------|
| Project Title         | Efficacy of acupuncture in improving the quality of life of patient's with moderate or severe acne vulgaris: protocol for a randomized controlled trial                                                                                                                                                                                                                                                                                                                                                                                                                                                                                                                                                                                                                                                                                                                                                                                                                                                                                        |                 |                                                                                                  |
| Approval No.          | 2018-137-KY-01                                                                                                                                                                                                                                                                                                                                                                                                                                                                                                                                                                                                                                                                                                                                                                                                                                                                                                                                                                                                                                 | Project Sponsor | Investigator                                                                                     |
| Research Organization | Guang'anmen Hospital of China Academy of Chinese Medical Sciences                                                                                                                                                                                                                                                                                                                                                                                                                                                                                                                                                                                                                                                                                                                                                                                                                                                                                                                                                                              |                 |                                                                                                  |
| Applicant             | None                                                                                                                                                                                                                                                                                                                                                                                                                                                                                                                                                                                                                                                                                                                                                                                                                                                                                                                                                                                                                                           |                 |                                                                                                  |
| Site PI               | Zliishun Liu                                                                                                                                                                                                                                                                                                                                                                                                                                                                                                                                                                                                                                                                                                                                                                                                                                                                                                                                                                                                                                   |                 |                                                                                                  |
| Review Attribute      | Initial Review                                                                                                                                                                                                                                                                                                                                                                                                                                                                                                                                                                                                                                                                                                                                                                                                                                                                                                                                                                                                                                 | Review Methods  | Review Conference                                                                                |
| Review Date           | December 20,2018                                                                                                                                                                                                                                                                                                                                                                                                                                                                                                                                                                                                                                                                                                                                                                                                                                                                                                                                                                                                                               | Review Place    | Conference Room, the 4 <sup>h</sup> Floor of the Administrative Building of Guang'anmen Hospital |
| Review Committee      | Haibo Yin, Lan Lin, Xinghua Feng, Limin Xie, Ling Feng, Ping Wu, Lizhen Gu, Mei Han                                                                                                                                                                                                                                                                                                                                                                                                                                                                                                                                                                                                                                                                                                                                                                                                                                                                                                                                                            |                 |                                                                                                  |
| Approval Files        | <ol style="list-style-type: none"> <li>1. Study Protocol (Version No. 2018120301; Version Date: Dec 03,2018)</li> <li>2. Case Report Form (Version No. 2018120301; Version Date: Dec 03,2018)</li> <li>3. Informed Consent (Version No. 2018120301; Version Date: Dec 03,2018)</li> <li>4. Recruiting Advertisement (Version No. 2018120301; Version Date: Dec 03,2018)</li> <li>5. Researchers' Handbook Version No. 2018120301; Version Date: Dec 03,2018)</li> </ol>                                                                                                                                                                                                                                                                                                                                                                                                                                                                                                                                                                        |                 |                                                                                                  |
| Review Comments       | <p>According to “ethical review methods for biomedical study involving human subjects” issued by the Ministry of Health, “Good Clinical Practice”, “Provisions for Clinical Trials of Medical Device” and “Guidelines for Ethical Review Work of Drug Clinical Trials” issued by State Food and Drug Administration (SFDA) of the People’s Republic of China, "management specifications for ethical review of TCM clinical studies” issued by State Administration of Traditional Chinese Medicine, “Declaration of Helsinki”, and “ International ethical guidelines for biomedical research involving human subjects” issued by Council for International Organizations of Medical Sciences, this clinical research was reviewed by the institutional review board (IRB) of Guang'anmen Hospital of China Academy of Chinese Medical Sciences. And the study protocol, informed consent, and the recruitment files of this research were approved.</p> <p>Please conduct this clinical study following the GCP principles and the study</p> |                 |                                                                                                  |



---
